# Supplementary material
Source: MDPI journal article supplement (https://www.mdpi.com/2673-995X/4/1/6)
Supplement: s1 [file s1 › youth-2686386-supplementary.pdf]

## Appendix

Table S1

*Longitudinal Measurement Invariance: Chi-Square Difference Comparisons for Parent-Adolescent Relationship Qualities and Well-being*

|                  | Models Compared          |                          |                      |
|------------------|--------------------------|--------------------------|----------------------|
|                  | Metric vs Configural $p$ | Scalar vs Configural $p$ | Scalar vs Metric $p$ |
| Conflict-Mother  | .85                      | .74                      | .44                  |
| Conflict -Father | .94                      | .99                      | .98                  |
| Warmth-Mother    | .47                      | .85                      | .95                  |
| Warmth-Father    | .93                      | .82                      | .45                  |
| Aut.sup.-Mother  | .38                      | .17                      | .12                  |
| Aut.sup.-Father  | .79                      | .23                      | .06                  |
| Satisfaction     | .60                      | .84                      | .85                  |
| Stress           | .00*                     | .00*                     | .68                  |

Note. Aut.sup-Mother= Autonomy support mother, Aut.sup.-Father= autonomy support father. \*  $p < .05$ .

Table S2  
*Testing Longitudinal Measurement Invariance for Stress*

|                         | $\Delta\chi^2$ ( $\Delta df$ ) | $\Delta RMSEA$ | $\Delta CFI$ | $\Delta TLI$ |
|-------------------------|--------------------------------|----------------|--------------|--------------|
| Stress                  |                                |                |              |              |
| Configural <sup>1</sup> |                                |                |              |              |
| Configural vs Metric    | 33.11(9)**                     | .002           | .012         | .008         |
| Metric vs Scalar        | 7.27(9)                        | .002           | .001         | .008         |
| Configural vs Scalar    | 40.38 (18)*                    | .000           | .011         | .000         |

Note. <sup>1</sup> Added error covariances are same in both time1 and time2 models. \*  $p < .01$ , \*\*  $p < .001$
